# Supplementary material for: Don’t ask for fair treatment? A gender analysis of ethnic discrimination, response to discrimination, and self-rated health among marriage migrants in South Korea
Source: Springer Nature journal article supplement (doi:10.1186/s12939-016-0396-7), 2016-07-18
Supplement: 12939_2016_396_MOESM1_ESM.pdf [file 12939_2016_396_MOESM1_ESM.pdf]

Table S1. Association between perceived ethnic discrimination and poor self-rated health, and the role of response to discrimination among marriage migrants in South Korea (N=14,406)

| Experience and response to ethnic discrimination | Total |            |              |                             |              | Male  |            |              |                             |              | Female |            |              |                             |              |
|--------------------------------------------------|-------|------------|--------------|-----------------------------|--------------|-------|------------|--------------|-----------------------------|--------------|--------|------------|--------------|-----------------------------|--------------|
|                                                  | N     | Unadjusted |              | Fully adjusted <sup>d</sup> |              | N     | Unadjusted |              | Fully adjusted <sup>d</sup> |              | N      | Unadjusted |              | Fully adjusted <sup>d</sup> |              |
|                                                  |       | OR         | 95% CI       | OR                          | 95% CI       |       | OR         | 95% CI       | OR                          | 95% CI       |        | OR         | 95% CI       | OR                          | 95% CI       |
| No experience <sup>a</sup>                       | 8,526 | 1          | referent     | 1                           | referent     | 1,194 | 1          | referent     | 1                           | referent     | 7,332  | 1          | referent     | 1                           | referent     |
| Not asking for fair treatment <sup>b</sup>       | 3,982 | 1.29**     | (1.13, 1.47) | 1.43**                      | (1.24, 1.66) | 590   | 0.99       | (0.71, 1.39) | 1.36                        | (0.91, 2.04) | 3,392  | 1.35**     | (1.17, 1.56) | 1.42**                      | (1.21, 1.67) |
| Asking for fair treatment <sup>c</sup>           | 1,898 | 1.44**     | (1.22, 1.70) | 1.61**                      | (1.34, 1.94) | 431   | 0.65*      | (0.42, 0.99) | 0.88                        | (0.54, 1.46) | 1,467  | 1.71**     | (1.43, 2.04) | 1.77**                      | (1.45, 2.17) |

\*p<0.05, \*\*p<0.001

OR, odds ratio; 95% CI, 95% confidence interval

<sup>a</sup> Marriage migrants who did not experience ethnic discrimination.

<sup>b</sup> Marriage migrants who experienced ethnic discrimination but did not ask for fair treatment.

<sup>c</sup> Marriage migrants who experienced ethnic discrimination and asked for fair treatment against the discrimination.

<sup>d</sup> Adjusted for age, education, marital status, nationality, residential area, years of stay in Korea, income, occupation, the family's perceived socio-economic position, and Korean language fluency.
